# Supplementary material
Source: PubMed Central journal article supplement (PMC5308613)
Supplement: NIHMS845742-supplement-Supplemental.pdf [file NIHMS845742-supplement-Supplemental.pdf]

## Supplements

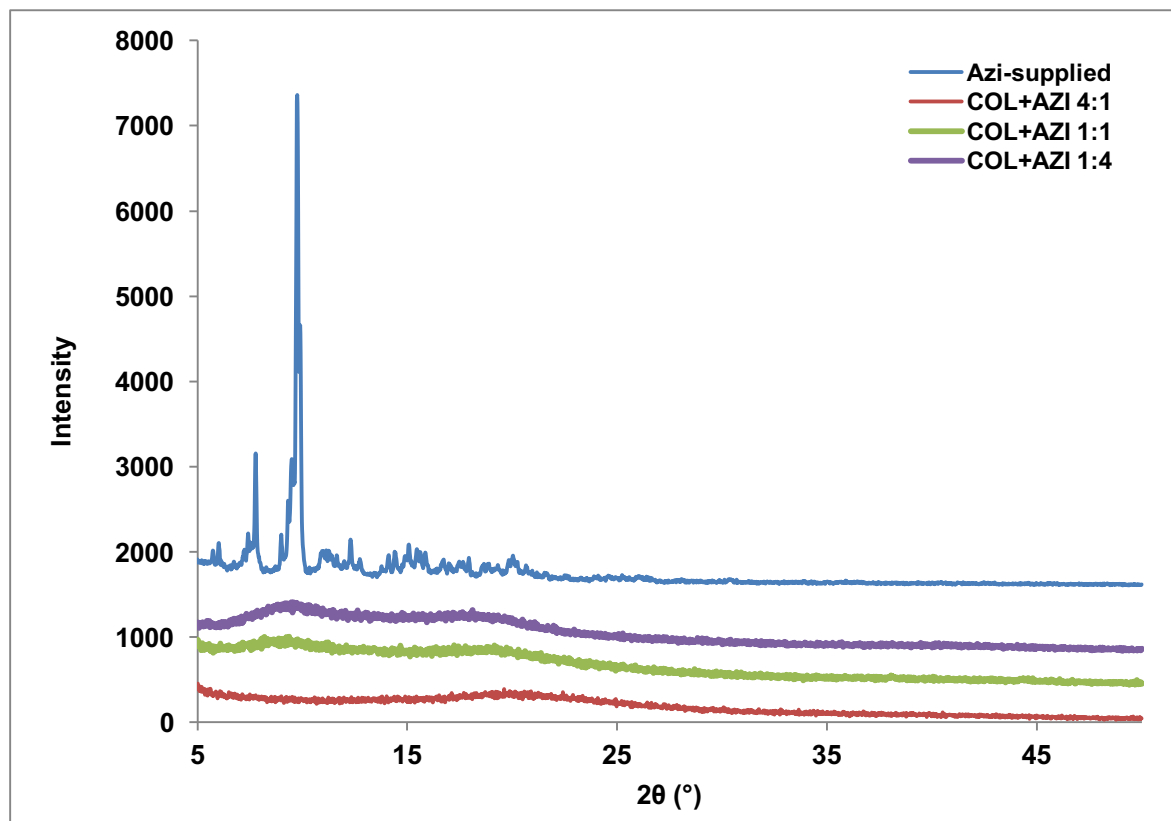

Supplement 1. Powder X-ray diffraction patterns of the spray-dried powder formulations.

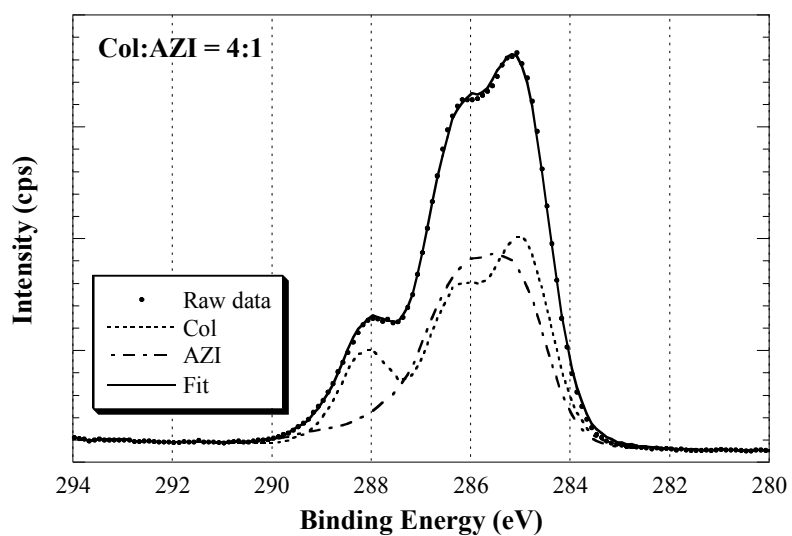

Supplement 2. C 1s high resolution spectrum of composite sample (4Col:1AZI) measured by XPS and two model spectra of the pure compounds (Col, AZI) used for curve-fitting.

Supplement 3. Estimates of molar fractions of Col and AZI in composite formulations, based on curve-fitting C 1s high resolution spectra with model spectra. See text for details.

|                     | Pure AZI | 1Col:4AZI | 1Col:1AZI | 4Col:1AZI | Pure Col |
|---------------------|----------|-----------|-----------|-----------|----------|
| <b>Colistin</b>     | 0.0 %    | 0.7 %     | 3.1 %     | 28.9 %    | 100.0 %  |
| <b>Azithromycin</b> | 100.0 %  | 99.3 %    | 96.9 %    | 71.1 %    | 0.0 %    |
